# Supplementary material for: Librarian: an open-access web application for high-resolution mass spectral library assembly
Source: Research Square preprint supplement (doi:10.21203/rs.3.rs-8766869/v1), 2026-02-13
Supplement: Supplementary file 2 [file 6cfb49ad26f1cc0360e50305.docx]

**Supplementary User Guide**

This guide is provided alongside the main paper to give a simple worked example of the Librarian web application workflow for users. The guide and the data used as input to modules are also available via the Librarian web application readme module.


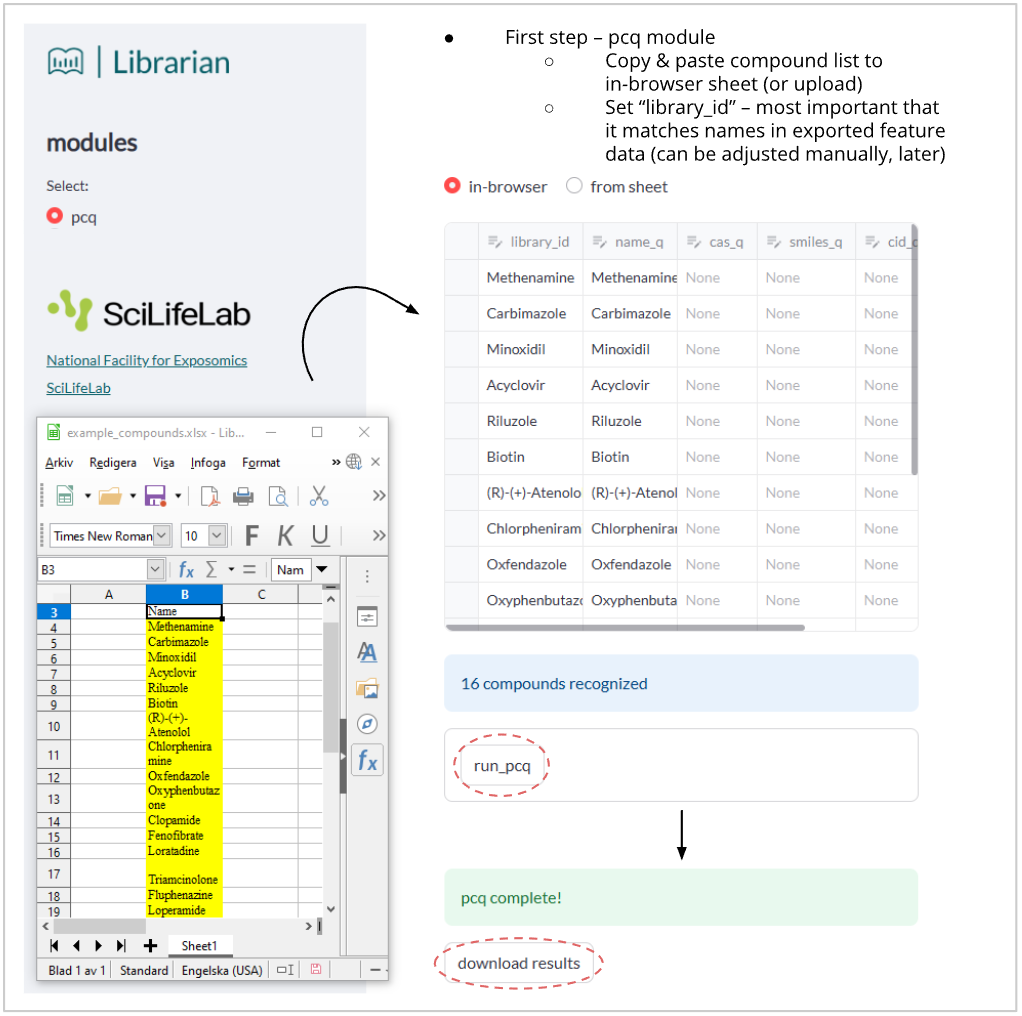


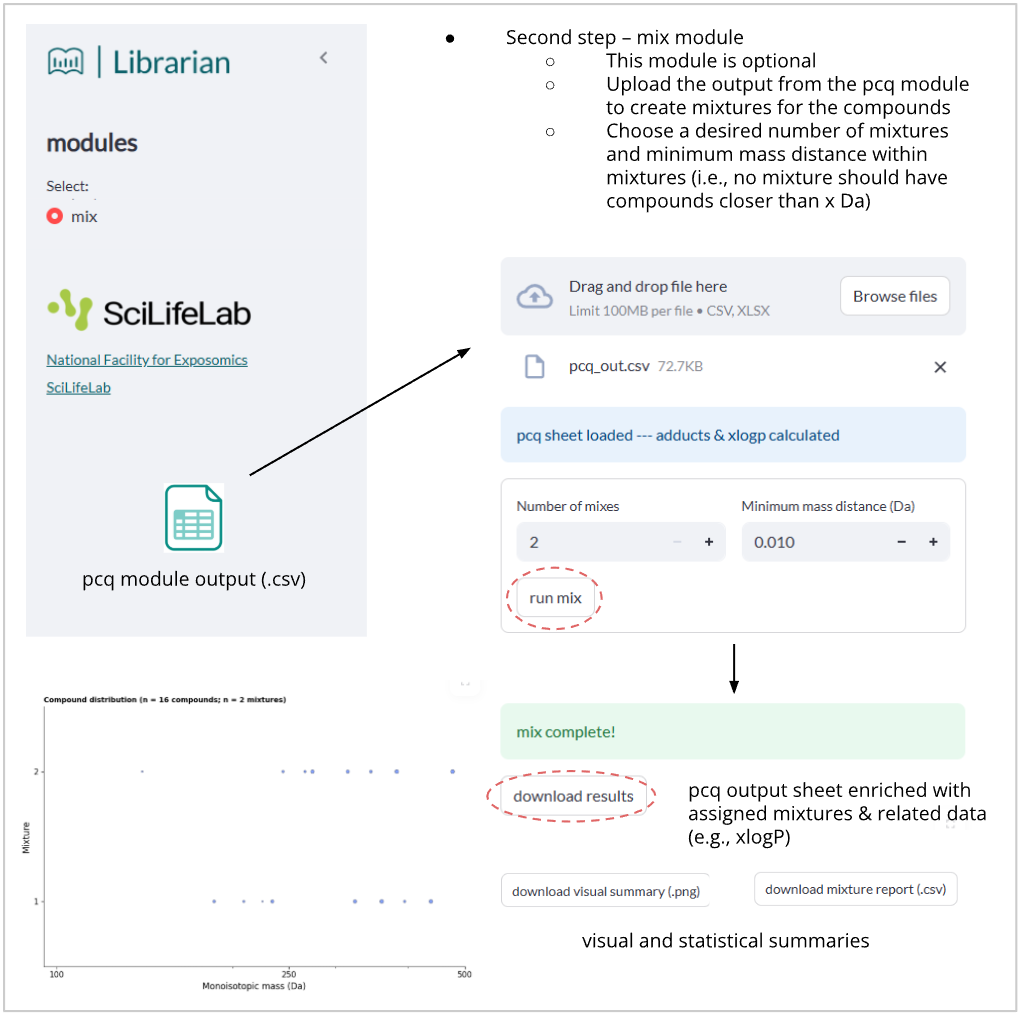


**
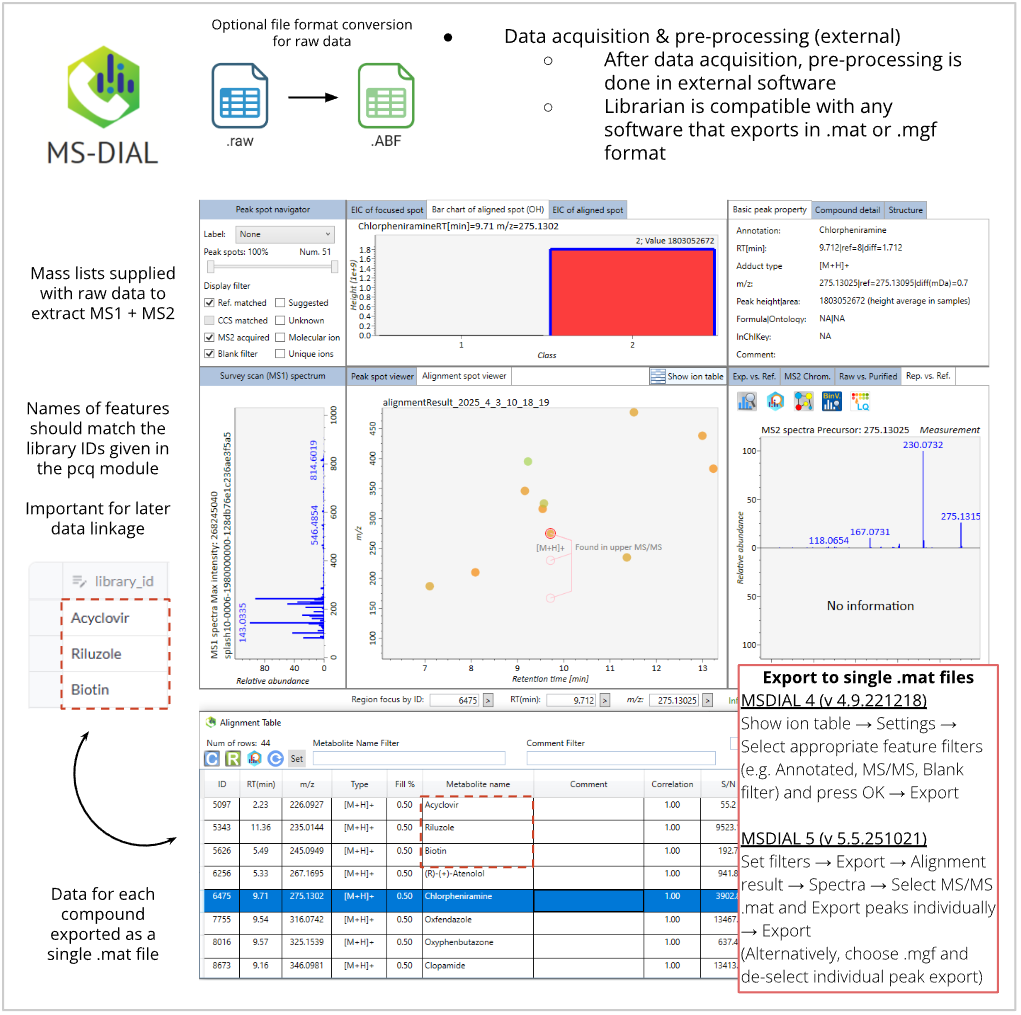
**


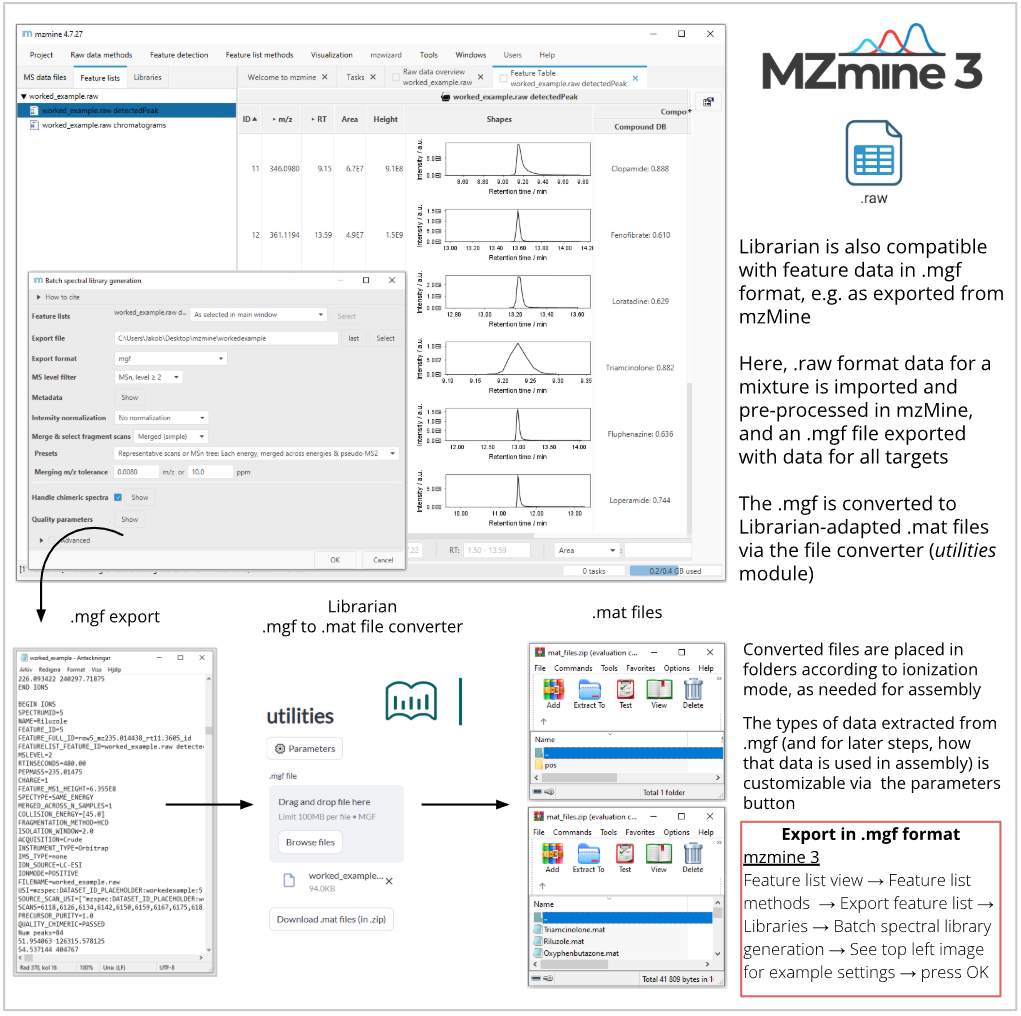


*
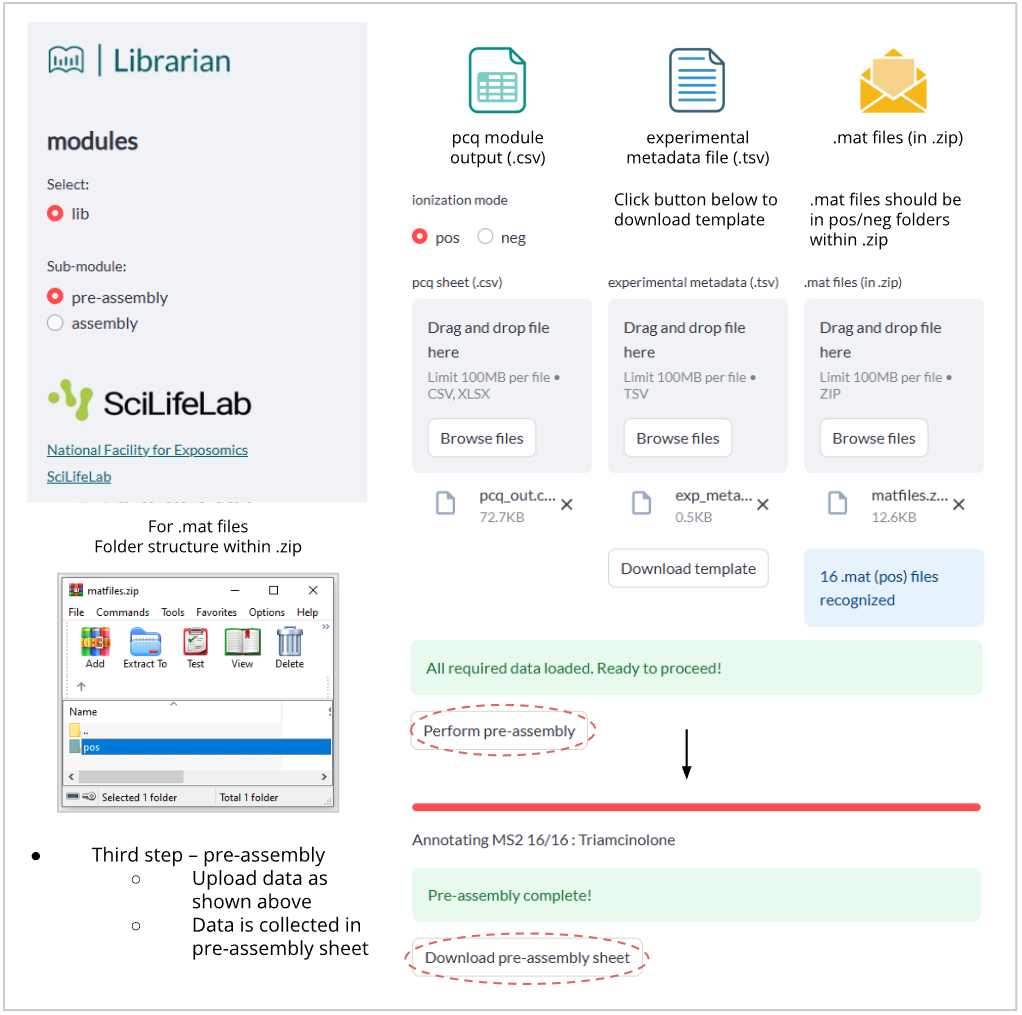
*

*
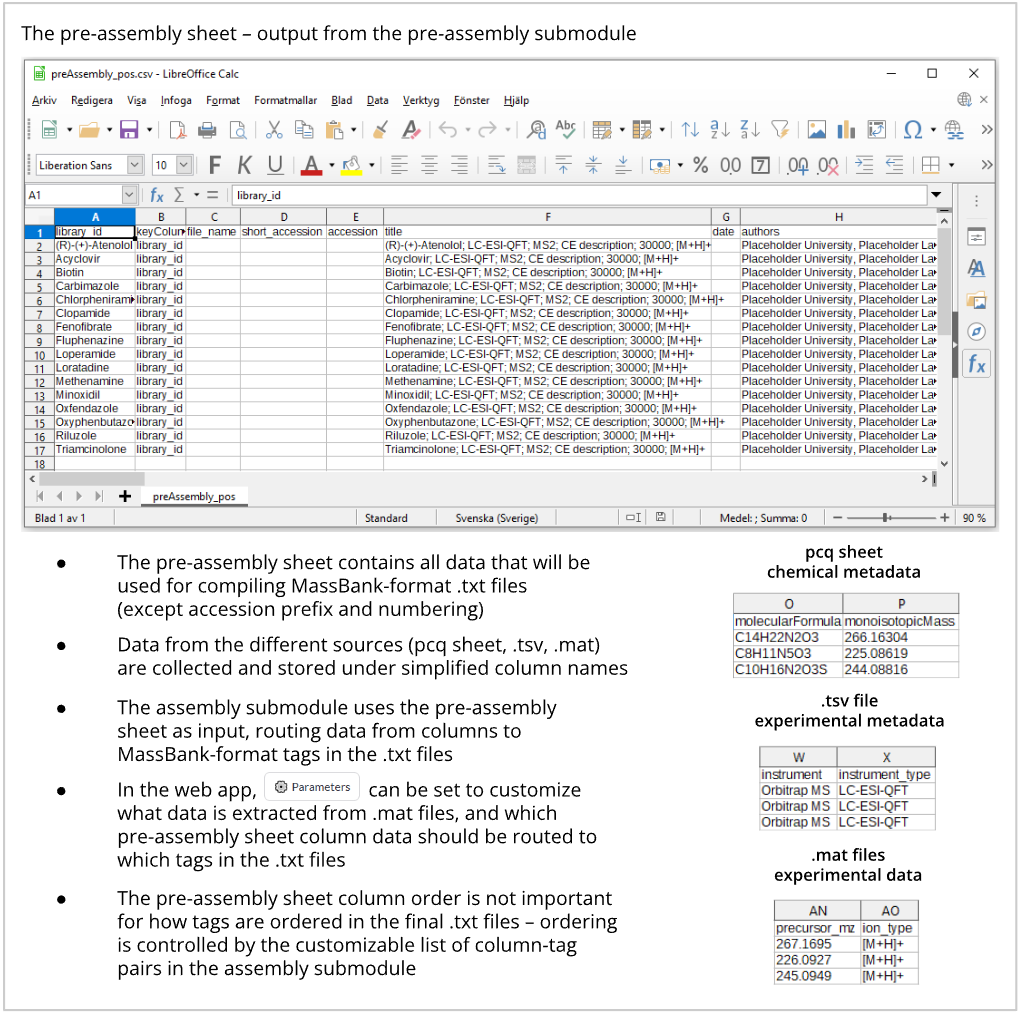
*

*
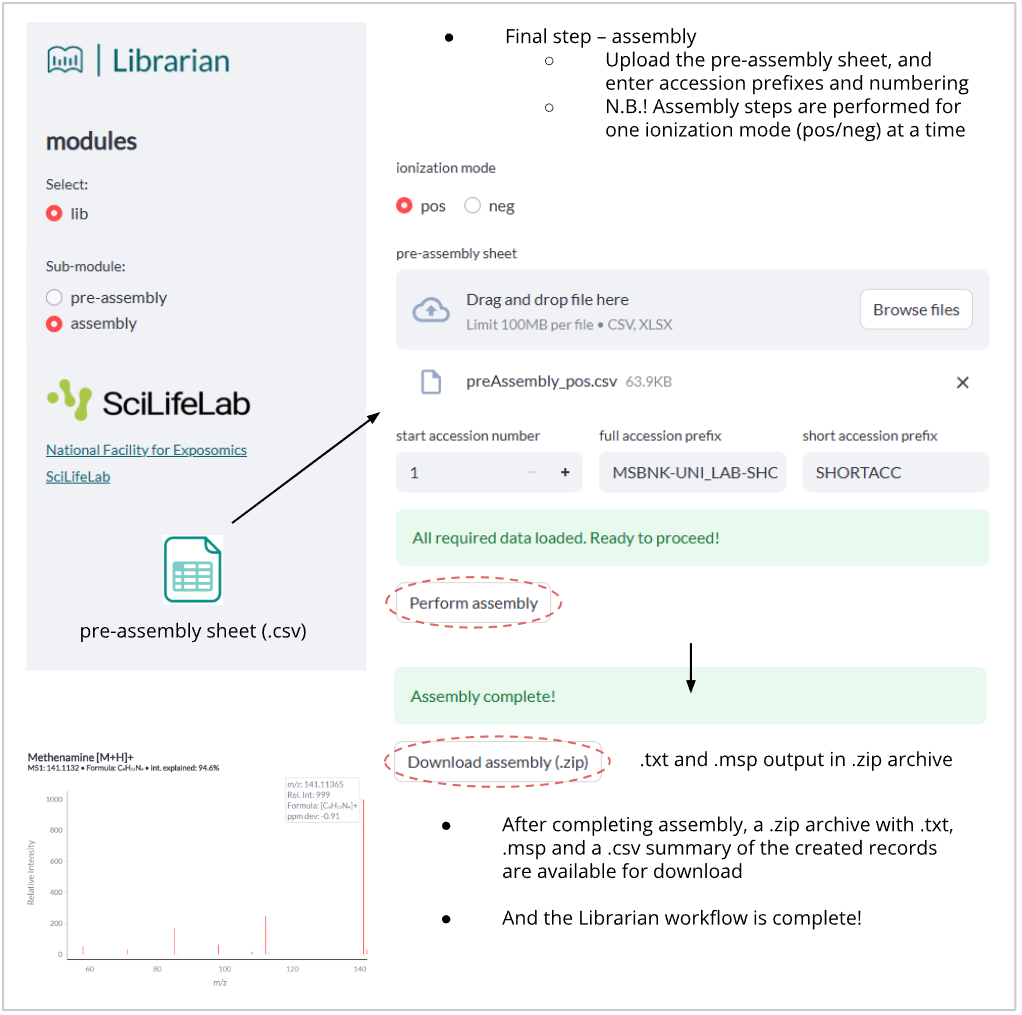
*
